# Supplementary material for: Effect of Fatty Acid Polyunsaturation on Synthesis and Properties of Emulsion Polymers Based on Plant Oil-Based Acrylic Monomers
Source: MDPI journal article supplement (doi:10.3390/molecules27030932), 2022-01-29
Supplement: s1 [file s1]

# Effect of Fatty Acid Polyunsaturation on Synthesis and Properties of Emulsion Polymers Based on Plant Oil-Based Acrylic Monomers

Vasylyna Kirianchuk <sup>1</sup>, Zoriana Demchuk <sup>2,3</sup>, Yehor Polunin <sup>2</sup>, Ananiy Kohut <sup>1</sup>, Stanislav Voronov <sup>1,†</sup> and Andriy Voronov <sup>2,\*</sup>

<sup>1</sup> Department of Organic Chemistry, Institute of Chemistry and Chemical Technologies, Lviv Polytechnic National University, 79013 Lviv, Ukraine; vasuluna411@ukr.net (V.K.); ananiy.kohut@gmail.com (A.K.); stanislav.voronov@gmail.com (S.V.)

<sup>2</sup> Department of Coatings and Polymeric Materials, North Dakota State University, Fargo, ND 58102, USA; zoriana.demchuk@ndsu.edu (Z.D.); yehor.polunin@ndsu.edu (Y.P.)

<sup>3</sup> Oak Ridge National Laboratory, Oak Ridge, TN 37830, USA

\* Correspondence: andriy.voronov@ndsu.edu

† Author is deceased, 18 July 2021.

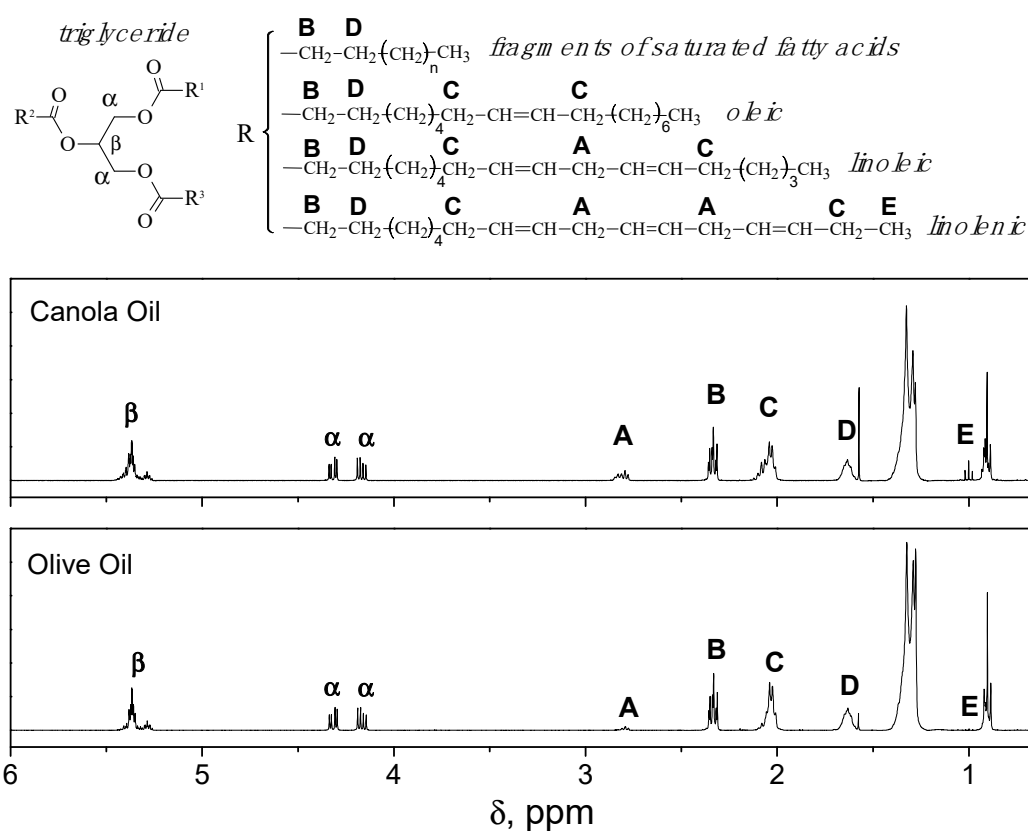

Figure S1. <sup>1</sup>H NMR spectra of canola and olive oils.

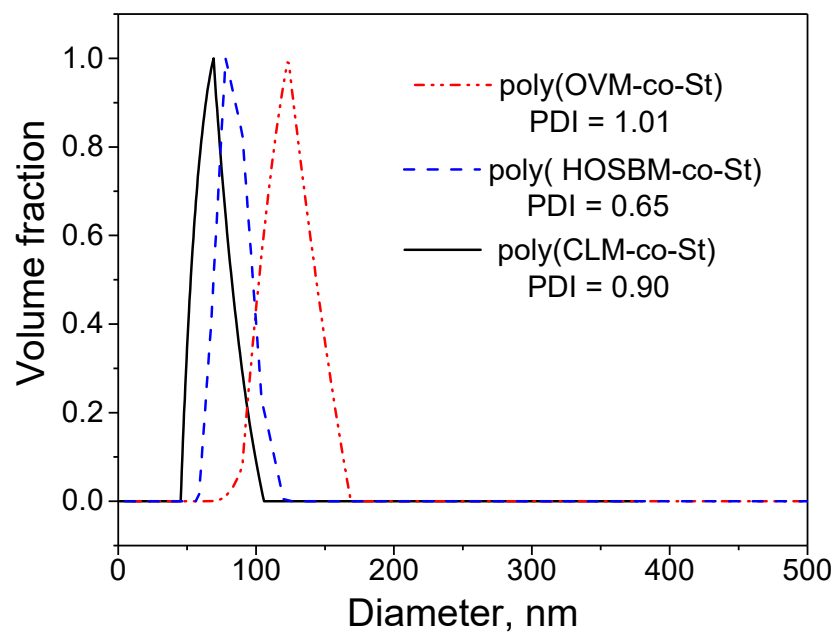

**Figure S2.** Latex particle size distribution POBM-St 60–40 wt.%.
